# Supplementary material
Source: HighWire-hosted journal article supplement (https://bmjopen.bmj.com/content/9/5/e028666)
Supplement: inline-supplementary-material-1 [file inline-supplementary-material-1.pdf]

**Appendix 1: Professional and personal characteristics of study respondents (n=1,310)**

| <b>Variable</b>        | <b>Category</b>                             | <b>Frequency (n)</b> | <b>Percentage (%)</b> |
|------------------------|---------------------------------------------|----------------------|-----------------------|
| Staff Position         | Assistant Nurse                             | 30                   | 2.4                   |
|                        | Nurse                                       | 697                  | 55.0                  |
|                        | Head nurse/Nurse manager                    | 27                   | 2.1                   |
|                        | Unit Assistant/Clerk                        | 4                    | 0.3                   |
|                        | Attending/Staff Physician                   | 227                  | 17.9                  |
|                        | Resident Physician/Physician in training    | 41                   | 3.2                   |
|                        | Pharmacist                                  | 21                   | 1.7                   |
|                        | Dietician                                   | 10                   | 0.8                   |
|                        | Respiratory Therapist                       | 3                    | 0.2                   |
|                        | Physical, Occupational, or Speech Therapist | 18                   | 1.4                   |
|                        | Technician                                  | 176                  | 13.9                  |
|                        | Management                                  | 13                   | 1.0                   |
| Gender                 | Male                                        | 479                  | 37.2                  |
|                        | Female                                      | 808                  | 62.8                  |
| Direct Patient Contact | Yes                                         | 1112                 | 88.5                  |
|                        | No                                          | 144                  | 11.5                  |

**Appendix 2:  
Conclusion from the solutions with different numbers of the factors (12- 9-8-7-10-11)**

| Step | Number of extracted factors | Number of the satisfactory factors | Total variance explained by extracted factors | Items not loading      | Items which have low communalities (<0.3)       | Items which have low loadings (<0.4)         |
|------|-----------------------------|------------------------------------|-----------------------------------------------|------------------------|-------------------------------------------------|----------------------------------------------|
| 1    | 12                          | 8                                  | 45                                            | A5- A11- A15- A17      | A5-A7-A9-A10- A11-A15-A17                       | A13- B3-D9- A6- C1-C5- A10- A7- D11- A18- C3 |
| 4    | 9                           | 7                                  | 41.0                                          | A5 - A9- A15- A17-A7   | A2-A5-A7-A9- A10-A15-A17                        | D9- B3- C5- A10- A2-A11                      |
| 5    | 8                           | 6                                  | 39.2                                          | A5-A15-A17-A9          | A2 - A5- A7- A9- A10- A11-A15- A17              | A13-D9- C5-A6- B3- A10-A7- A2- A11           |
| 6    | 7                           | 5                                  | 37.4                                          | A11-A5-A7-A9- A15- A17 | A2 - A5- A7- A9- A10 - A11- A15- A17- B3 -C3-D6 | C3-A18-A13- C1- A2- B4-B3-A10                |
| 7    | 11                          | 9                                  | 43.8                                          | A5-A7- A17             | A5- A7- A9- A10- A11- A15- A17- D6              | B3-D9- A6- A10- A9-A13- C5- A7- A11          |
| 8    | 10                          | 9                                  | 42.6                                          | A5-A7- A17 A9          | A5 - A7- A9- A10 - A11- A15- A17- D6            | A13-D9- C5- A10- A11                         |

An investigation of five possible solutions was undertaken in steps 4-8 to explore the number of factors that could be extracted. The initial solution with 12 factors demonstrates that 8 factors could fit the 42 safety climate items. The 9 Factors solution demonstrates that 7 factors could fit the 42 safety climate items. The 8 Factors solution demonstrates that 6 factors could fit the 42 safety climate items. The 11 Factors solution demonstrates that 9 factors could fit the 42 safety climate items. The 10 Factors solution demonstrates that 9 factors fit the 42 safety climate items. The summary results of the six solutions including the initial solution are displayed in the above table. The comparison of the different solutions suggests that the 8 Factors solution is most

appropriate (four items without loadings, the initial solution with 12 factors indicates that 8 factors is satisfactory, only one factor is without strongly loaded items).

The optimal model is an Eight Factor model with 22 safety climate questionnaire items (20 items were excluded) that explains about 50.2% of the total variance. All factor loadings are within the range of 0.426-0.866. Five factors (Factor 2, Factor 3, Factor 4, Factor 6, and Factor 7) have three or more items with loadings  $>0.40$ . Factor 1, Factor 5, and Factor 8 have two items with very high loading  $>0.50$  and acceptable theoretical basis. There are no cross loaded items and there are no items with loadings  $<0.40$  in the solution. The solution is essentially consistent with the theoretical pattern. All factors consist of two to four items and all items within each factor are theoretically related. Only D6 moved from "Teamwork across units" into "Handoffs and Transitions." It should be noted that "Overall perceptions of patient safety", "Organisational learning—Continuous improvement", "Staffing" and "Feedback and communication about error" have no items in the final 8 factor solution.

In summary, the optimal Eight Factor model shows good psychometric properties with no cross loaded items and there are no items with loadings  $<0.40$  in the solution. All factors consist of two to four items and all items within each factor are theoretically related. The optimal model of our study was confirmed by using CFA.

**Appendix 3:  
HSOPSC Eight factor model in Kuwait and individual item standardised path coefficients**

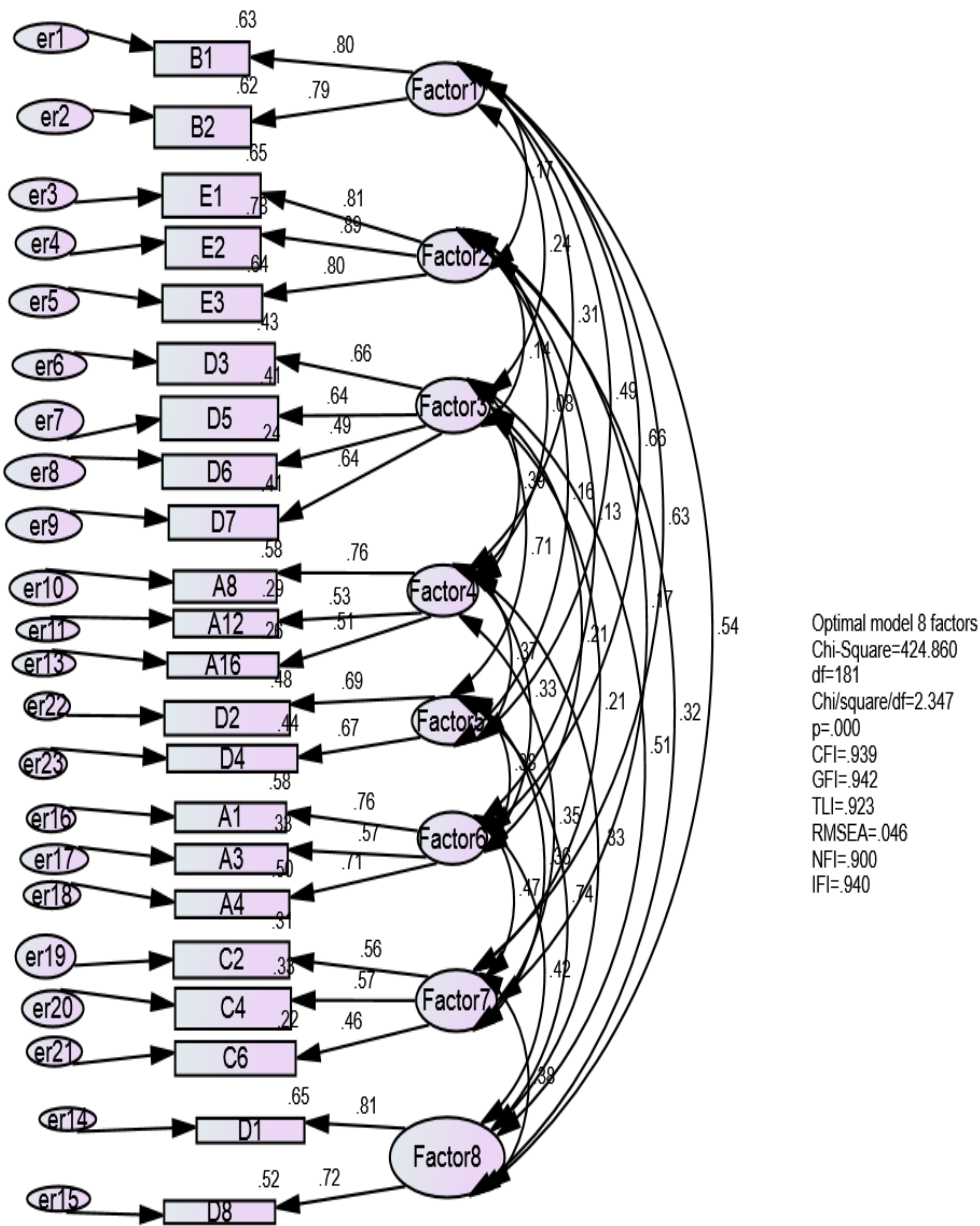

**Appendix 4: Inter-correlations between Eight factors (scales)**

| <b>N</b> | <b>Scales</b>                                                        | <b>1</b> | <b>2</b> | <b>3</b> | <b>4</b> | <b>5</b> | <b>6</b> | <b>7</b> |
|----------|----------------------------------------------------------------------|----------|----------|----------|----------|----------|----------|----------|
| 1        | Supervisor/Manager Expectations and Actions Promoting Patient Safety | -        |          |          |          |          |          |          |
| 2        | Frequency of Events Reported                                         | 0,155*** |          |          |          |          |          |          |
| 3        | Handoffs and Transitions                                             | 0,286*** | 0,183*** |          |          |          |          |          |
| 4        | Non-punitive Response to Errors                                      | 0,339*** | 0,133*** | 0,371*** |          |          |          |          |
| 5        | Teamwork Across Units                                                | 0,51***  | 0,228*** | 0,64***  | 0,435*** |          |          |          |
| 6        | Teamwork Within Units                                                | 0,664*** | 0,105**  | 0,236*** | 0,356*** | 0,392*** |          |          |
| 7        | Communication Openness                                               | 0,614*** | 0,088*   | 0,259*** | 0,431*** | 0,404*** | 0,517*** |          |
| 8        | Management Support for Patient Safety                                | 0,519*** | 0,311*** | 0,531*** | 0,322*** | 0,722*** | 0,432*** | 0,353*** |

\*\*\* p<0.001, \*\* p<0.01, \*p<0.05

**Appendix 5: Dimensions of HSOPSC for USA (US), Kuwait (KWT), Saudi Arabia (SA), Palestine (PAL), England (ENG), Scotland (SCO), Netherlands (NL), Turkey (TUR) and Switzerland (Swiss) factor models**

| <b>HSOPSC Dimensions</b>                                     | <b>US<br/>59</b> | <b>KWT</b> | <b>SA<br/>60</b> | <b>PAL<br/>61</b>                      | <b>ENG<br/>31</b> | <b>SCO<br/>78</b>                      | <b>NL<br/>30</b>                                                      | <b>TUR<br/>26</b>                                                                     | <b>SWISS<br/>27</b>                    |
|--------------------------------------------------------------|------------------|------------|------------------|----------------------------------------|-------------------|----------------------------------------|-----------------------------------------------------------------------|---------------------------------------------------------------------------------------|----------------------------------------|
| Supervisor/manager expectations and actions promoting safety | √                | √          | √                | √                                      | √                 | √                                      | -                                                                     | -                                                                                     | √                                      |
| Organisational learning— continuous improvement              | √                | -          | √                | √                                      | -                 | √                                      | √                                                                     | √                                                                                     | √<br>With<br>Teamwork<br>within units  |
| Teamwork within hospital units                               | √                | √          | √                | √                                      | √                 | √                                      | √                                                                     | √                                                                                     | -                                      |
| Communication openness                                       | √                | √          | √                | -                                      | √                 | -                                      | √                                                                     | √                                                                                     | -                                      |
| Feedback and communication about error                       | √                | -          | -                | √<br>With<br>Communication<br>Openness | √                 | √<br>With<br>Communication<br>Openness | √<br>With<br>Organisational<br>learning—<br>continuous<br>improvement | √<br>With<br>Supervisor<br>expectations<br>and actions<br>promoting<br>patient safety | √<br>With<br>Communication<br>Openness |
| Non-punitive response to error                               | √                | √          | √                | √                                      | √                 | √                                      | √                                                                     | √                                                                                     | √                                      |
| Staffing                                                     | √                | -          | √                | √                                      | -                 | -                                      | √                                                                     | √                                                                                     | -                                      |
| Hospital management support for patient safety               | √                | √          | -                | √                                      | -                 | √                                      | √                                                                     | √<br>With<br>Teamwork<br>across units                                                 | √                                      |

| <b>HSOPSC Dimensions</b>              | <b>US<br/>59</b> | <b>KWT</b> | <b>SA<br/>60</b> | <b>PAL<br/>61</b> | <b>ENG<br/>31</b>  | <b>SCO<br/>78</b>  | <b>NL<br/>30</b> | <b>TUR<br/>26</b> | <b>SWISS<br/>27</b>                   |
|---------------------------------------|------------------|------------|------------------|-------------------|--------------------|--------------------|------------------|-------------------|---------------------------------------|
| Teamwork across hospital units        | √                | √          | -                | √                 | √                  | √                  | √                | -                 | -                                     |
| Hospital handoffs and transitions     | √                | √          | √                | √                 | √                  | √                  | √                | √                 | √<br>With<br>Teamwork<br>across units |
| Frequency of incident reporting       | √                | √          | √                | √                 | √                  | √                  | √                | √                 | √                                     |
| Overall perceptions of patient safety | √                | -          | -                | √                 | √<br>With Staffing | √<br>With Staffing | √                | √                 | √<br>With Staffing                    |
| Number of optimal model factors       | 12               | 8          | 8                | 11                | 9                  | 10                 | 11               | 10                | 8                                     |

**Appendix 6: Item composition of dimensions of HSOPSC for USA (US), Kuwait (KWT), Saudi Arabia (SA), England (ENG), Palestine (PAL), Switzerland (Swiss), Netherlands (NL), and Turkey (TUR) factor models**

| <b>HSOPSC Factors</b>                                                | <b>USA</b><br>59 | <b>Kuwait</b> | <b>SA</b><br>60 | <b>ENG</b><br>31 | <b>PAL</b><br>61 | <b>SWISS</b><br>27     | <b>NL</b><br>30     | <b>TUR</b><br>26 |
|----------------------------------------------------------------------|------------------|---------------|-----------------|------------------|------------------|------------------------|---------------------|------------------|
| Supervisor/Manager Expectations and Actions Promoting Patient Safety | B1-B2-B3-B4      | B1-B2         | B1-B2           | B1-B2            | B1-B2-B3-B4      | B1-B2-B3-B4            | B1-B2-B3-B4         | ‡                |
| Frequency of Events Reported                                         | E1-E2-E3*        | E1-E2-E3      | E1-E2-E3        | E1-E2-E3         | E1-E2-E3         | E1-E2-E3               | E1-E2-E3            | E1-E2-E3         |
| Handoffs and Transitions                                             | D3-D5-D7-D11*    | D3-D5-D7-D6** | D5- D7-D11-D6** | D3-D5-D7-D11     | D3-D5-D7-D11     | ‡                      | D5 -D11             | D3-D5-D7-D11     |
| Non-punitive Response to Errors                                      | A8-A12-A16       | A8-A12-A16    | A8-A12-A16      | A8-A16           | A8-A12-A16       | A8-A12-A16             | A8-A12-A16          | A8-A12-A16       |
| Teamwork Across Units                                                | D2-D4-D6-D10*    | D2-D4         | -               | D2-D4-D6-D10     | D2-D4-D6-D10     | D2-D4-D6-D10-D3**-D7** | D2-D4-D10-D3**-D7** | ‡                |
| Teamwork Within Units                                                | A1-A3-A4-A11     | A1-A3-A4      | A1-A3-A4        | A1-A3-A4         | A1-A3-A4-A11     | A1-A3-A4-A6-A9-A13‡    | A1-A3-A4-A11        | A1-A3-A4-A11     |
| Communication Openness                                               | C2-C4-C6         | C2-C4-C6      | C2-C4           | C2-C4-C6         | C2-C4-C3-C5‡     | ‡                      | C2-C4-C6            | C2-C4-C6         |



| <b>HSOPSC Factors</b>                          | <b>USA</b><br>59 | <b>Kuwait</b> | <b>SA</b><br>60 | <b>ENG</b><br>31 | <b>PAL</b><br>61 | <b>SWISS</b><br>27     | <b>NL</b><br>30    | <b>TUR</b><br>26      |
|------------------------------------------------|------------------|---------------|-----------------|------------------|------------------|------------------------|--------------------|-----------------------|
| Management Support for Patient Safety          | D1-D8-D9*        | D1-D8         | -               | -                | D1-D8-D9         | D1-D8-D9               | D1-D8-D9           | D1-D8-D9              |
| Organisational learning—continuous improvement | A6-A9-A13        | -             | A6-A9-A13-D8**  | -                | A6-A9-A13        | ‡                      | ‡                  | A6-A9-A13             |
| Feedback and communication about error         | C1-C3-C5         | -             | -               | C1-C3-C5         | ‡                | C1-C3-C5-C2-C4-C6‡     | C1-C3-C5-A6-A9-A13 | C1-C3-C5-B1-B2-B3-B4‡ |
| Staffing                                       | A2-A5-A7-A14     | -             | A5-A7           | A2-A14-A10-A17‡  | A2-A5-A14        | A2-A5-A14-A10-A17-A18‡ | A2-A5-A7           | A2-A5-A7-A14          |
| Overall perceptions of safety                  | A10-A15-A17-A18  | -             | -               | ‡                | A15-A17-A18      | ‡                      | A10-A17-A18-A14**  | A10-A15-A17-A18       |
| No of factors                                  | 12               | 8             | 8               | 9                | 11               | 8                      | 11                 | 10                    |

\*For comparison reasons, items with the letter F have been changed to letter D and items with the letter D have been changed to letter E as the modified version used in our study, ‡ denotes a merged dimension, \*\* denotes a moved item from a different dimension
